# Supplementary material for: Comparative analysis of microRNA expression in mouse and human brown adipose tissue
Source: PubMed Central journal article supplement (PMC4617708; doi:10.1186/s12864-015-2045-8), 2015-10-19
Supplement: 12864_2015_2045_MOESM1_ESM.pdf [file 12864_2015_2045_MOESM1_ESM.pdf]

**Additional file 1:** Muscle-enriched and WAT-enriched miRNAs, and miRNAs commonly enriched in mouse muscle and WAT.

| <b>Mouse tissues</b>            |                                    |                                    |                                           |
|---------------------------------|------------------------------------|------------------------------------|-------------------------------------------|
| <b>Muscle-enriched miRNA ID</b> | <b>WAT-enriched miRNA ID (1/2)</b> | <b>WAT-enriched miRNA ID (2/2)</b> | <b>Muscle &amp; WAT-enriched miRNA ID</b> |
| miR-1193                        | let-7a#                            | miR-297a#                          | miR-136#                                  |
| miR-1943                        | let-7d#                            | miR-299                            | miR-143                                   |
| miR-206                         | let-7g#                            | miR-29a#                           | miR-196a                                  |
| miR-211                         | miR-10b#                           | miR-30b#                           | miR-213                                   |
| miR-466b                        | miR-1186                           | miR-30c-2#                         | miR-214#                                  |
| miR-489                         | miR-1188                           | miR-31#                            | miR-299-5p                                |
| miR-493                         | miR-1191                           | miR-326                            | miR-340                                   |
| miR-493-3p                      | miR-1195                           | miR-327                            | miR-421                                   |
| miR-673-3p                      | miR-125b#                          | miR-33a#                           | miR-10b                                   |
| miR-675-3p                      | miR-1306                           | miR-344                            | miR-1198                                  |
| miR-704                         | miR-144                            | miR-345                            | miR-1839-5p                               |
|                                 | miR-147                            | miR-347                            | miR-186#                                  |
|                                 | miR-148a#                          | miR-34b-5p                         | miR-1897-5p                               |
|                                 | miR-15a#                           | miR-362-5p                         | miR-1905                                  |
|                                 | miR-15b#                           | miR-376a#                          | miR-1954                                  |
|                                 | miR-17#                            | miR-376a#                          | miR-196b                                  |
|                                 | miR-1894-3p                        | miR-377                            | miR-2182                                  |
|                                 | miR-1896                           | miR-465a-3p                        | miR-2183                                  |
|                                 | miR-1940                           | miR-465b-5p                        | miR-337                                   |
|                                 | miR-1957                           | miR-466a-3p                        | miR-369-3p                                |
|                                 | miR-1961                           | miR-466g                           | miR-376b#                                 |
|                                 | miR-1981                           | miR-466j                           | miR-504                                   |
|                                 | miR-200a#                          | miR-467a                           | miR-539                                   |
|                                 | miR-200b                           | miR-467b                           | miR-590-5p                                |
|                                 | miR-200c                           | miR-485-3p                         | miR-615-5p                                |
|                                 | miR-20a#                           | miR-632                            | miR-665                                   |
|                                 | miR-216b                           | miR-669n                           | miR-696                                   |
|                                 | miR-217                            | miR-676#                           | miR-29c#                                  |
|                                 | miR-27a#                           | miR-712                            | miR-350                                   |
|                                 | miR-28-3p                          | miR-743a                           |                                           |
|                                 | miR-292-3p                         | miR-744#                           |                                           |
|                                 | miR-293                            | miR-878-3p                         |                                           |
|                                 | miR-295                            | miR-99a#                           |                                           |
|                                 | miR-296-3p                         |                                    |                                           |
