# Supplementary material for: Comparative analysis of microRNA expression in mouse and human brown adipose tissue
Source: PubMed Central journal article supplement (PMC4617708; doi:10.1186/s12864-015-2045-8), 2015-10-19
Supplement: 12864_2015_2045_MOESM4_ESM.pdf [file 12864_2015_2045_MOESM4_ESM.pdf]

**Additional file 4:** Table of the 145 miRNAs commonly expressed in both human and mouse BAT.

| <b>145 miRNAs commonly expressed in both human and mouse BAT</b> |             |            |            |            |
|------------------------------------------------------------------|-------------|------------|------------|------------|
| let-7a                                                           | miR-142-3p  | miR-19b    | miR-30d    | miR-433    |
| let-7b                                                           | miR-143     | miR-200c   | miR-30e-3p | miR-451    |
| let-7c                                                           | miR-145     | miR-203    | miR-320    | miR-455-5p |
| let-7d                                                           | miR-146a    | miR-204    | miR-323-3p | miR-455-3p |
| let-7e                                                           | miR-146b    | miR-20a    | miR-324-3p | miR-484    |
| let-7f                                                           | miR-148a    | miR-20b    | miR-328    | miR-486    |
| let-7g                                                           | miR-149     | miR-21     | miR-331-3p | miR-489    |
| miR-100                                                          | miR-150     | miR-210    | miR-335-5p | miR-491    |
| miR-101a                                                         | miR-151-3p  | miR-212    | miR-337-5p | miR-494    |
| miR-103                                                          | miR-151-5P  | miR-214    | miR-338-5P | miR-495    |
| miR-106a                                                         | miR-152     | miR-218    | miR-339-3p | miR-500    |
| miR-106b                                                         | miR-155     | miR-22     | miR-339-5p | miR-511    |
| miR-10a                                                          | miR-15a     | miR-22#    | miR-340-5p | miR-532-3p |
| miR-10b                                                          | miR-15b     | miR-222    | miR-342-3p | miR-532-5p |
| miR-125a-5p                                                      | miR-16      | miR-223    | miR-345-5p | miR-574-3p |
| miR-125b-5p                                                      | miR-17      | miR-224-5p | miR-34a    | miR-598    |
| miR-126-3p                                                       | miR-181a    | miR-24     | miR-365    | miR-652    |
| miR-127                                                          | miR-185     | miR-25     | miR-370    | miR-664    |
| miR-130a                                                         | miR-186     | miR-26a    | miR-376a   | miR-7#     |
| miR-130b                                                         | miR-18a     | miR-26b    | miR-376c   | miR-708    |
| miR-132                                                          | miR-191     | miR-27a    | miR-378    | miR-720    |
| miR-133a                                                         | miR-192     | miR-28     | miR-379    | miR-744    |
| miR-133b                                                         | miR-193     | miR-29a    | miR-382    | miR-9      |
| miR-134                                                          | miR-193b    | miR-29c    | miR-409-3p | miR-92a    |
| miR-138                                                          | miR-194     | miR-301a   | miR-410    | miR-93     |
| miR-139-3p                                                       | miR-195     | miR-30a    | miR-411    | miR-93#    |
| miR-139-5p                                                       | miR-197     | miR-30a-3p | miR-423-5p | miR-99a    |
| miR-140                                                          | miR-199a-3p | miR-30b    | miR-425    | miR-99b    |
| miR-140-3p                                                       | miR-19a     | miR-30c    | miR-431    | miR-99b#   |
